# Supplementary material for: Risk of SARS-CoV-2 infection in migrants and ethnic minorities compared with the general population in the European WHO region during the first year of the pandemic: a systematic review
Source: Springer Nature journal article supplement (doi:10.1186/s12889-021-12466-1), 2022-01-20
Supplement: MOESM1 [file 20052688]

# Systematic review: COVID-19 and migrants

## Study question

**Are migrants, refugees, and ethnic minorities more exposed to the risk of SARS-CoV-2 infection than the indigenous population?**

**Databases:** Medline, Embase, Biosis, Scisearch, Esbiobase

**Languages:** English, French, Spanish, Italian

**Years:** 2020-2021

**N. Record:** 1896

### Search strategy

L1 65450 S "TRANSIENTS AND MIGRANTS"/CT OR "EMIGRANTS AND IMMIGRANTS"+NT  
L2 307215 S (MIGRANT# OR IMMIGRANT# OR TRANSIENTS OR IMMIGRATION# OR  
EMIGRATION#)/TI,AB  
L3 80600 S HUMAN MIGRATION+NT/CT OR MIGRATION+NT/CT  
L4 6950 S (HUMAN OR INTERNATIONAL) (W)MIGRATION#/TI,AB  
L5 39795 S (REFUGEE# OR INTERNALLY DISPLACED OR FORCIBLY DISPLACED OR  
INTERNATIONAL PROTECTION SEEKER# OR ASYLUM SEEKER# OR ASYLEE# OR  
SUBSIDIARY PROTECTION SEEKER# OR HUMANITARIAN PROTECTION  
SEEKER#)/TI,AB  
L6 895 S UNDOCUMENTED IMMIGRANT/CT  
L7 757 S (UNDOCUMENTED OR ILLEGAL OR IRREGULAR) (W) (PERSON# OR PEOPLE#  
OR INDIVIDUAL# OR POPULATION# OR PATIENT#)/TI,AB  
L8 367 S (UNDOCUMENTED OR ILLEGAL OR IRREGULAR) (W) (WORKER# OR ALIEN# OR  
FOREIGNER# OR STRANGER#)/TI,AB  
L9 217 S (UNAUTHORIZED OR UNAUTHORISED) (W) (PERSON# OR PEOPLE# OR  
INDIVIDUAL# OR POPULATION# OR PATIENT#)/TI,AB  
L10 15 S (UNAUTHORIZED OR UNAUTHORISED) (W) (WORKER# OR ALIEN# OR  
FOREIGNER# OR STRANGER#)/TI,AB  
L11 161165 S MINORITY GROUPS/CT OR MINORITY GROUP/CT OR ETHNIC GROUPS/CT  
OR ETHNIC GROUP/CT  
L12 427907 S ETHNIC? (A)MINORIT?/TI,AB OR ETHNIC (W) (GROUP# OR  
COMMUNIT?)/TI,AB OR ETHNICITY/TI,AB  
L13 147677 S ETHNICITY/CT  
L14 83892 S RACE FACTORS/CT OR RACE/CT  
L15 562240 S RACE/TI,AB OR RACES/TI,AB OR RACIAL (W) (GROUP# OR COMMUNIT? OR  
MINORIT?)/TI,AB  
L16 1390187 S L1-L15  
L17 9305284 S INFECTIONS+NT/CT OR INFECTION+NT/CT  
L18 6845773 S (INFECTION# OR INFECTIVIT? OR INFECTIOUS)/TI,AB  
L19 1140590 S (CONTAGION# OR CONTAGIOUS OR CONTAMINAT?)/TI,AB  
L20 279292 S DISEASE TRANSMISSION, INFECTIOUS+NT/CT OR DISEASE  
TRANSMISSION+NT/CT  
L21 2590641 S (TRANSMISSION# OR TRANSMITT?)/TI,AB  
L22 30567 S VULNERABLE POPULATIONS/CT OR VULNERABLE POPULATION/CT  
L23 659551 S (VULNERABLE OR VULNERABILIT?)/TI,AB  
L24 5895176 S EXPOS?/TI,AB  
L25 21006115 S L17-L24  
L26 2026293 S RISK FACTORS/CT OR RISK FACTOR/CT OR INFECTION RISK/CT  
L27 10022193 S RISK#/TI,AB

L28 5170167 S INCIDENCE+NT/CT OR PREVALENCE+NT/CT OR FREQUENCY/CT OR MORBIDITY+NT/CT OR EPIDEMIOLOGY/CT

L29 12684090 S (INCIDENCE# OR PREVALENCE# OR FREQUENC? OR MORBIDIT? OR EPIDEMIOLOG?)/TI,AB

L30 35938 S (HOMELESS? OR HOUSELESS? OR ROOFLESS?)/TI,AB

L31 210914 S SOCIAL CONDITIONS+NT/CT OR SOCIAL STATUS+NT/CT

L32 11838 S SOCIAL CONDITION#/TI,AB

L33 46909 S LIVING(W) (STANDARD# OR CONDITION# OR ARRANGEMENT# OR ACCOMODATION# OR SPACE#)/TI,AB

L34 514168 S HOUSING+ALL/CT

L35 169273 S HOUSING/TI,AB OR (OVERCROWD? OR OVER CROWD?)/TI,AB

L36 25778 S QUARANTINE+NT/CT OR ISOLATION+NT/CT

L37 1322065 S (ISOLATION# OR QUARANTINE# OR QUARANTINE#)/TI,AB

L38 76935 S (CLOSE OR STRICT OR PHYSICAL OR PERSONAL OR SOCIAL) (W) CONTACT?/TI,AB

L39 20256 S (SOCIAL OR PHYSICAL OR PERSONAL) (W) DISTANC?/TI,AB

L40 32427 S PERSONAL PROTECTIVE EQUIPMENT+NT/CT

L41 43197 S PROTECT?(W) (DEVICE# OR EQUIPMENT OR PRODUCT#)/TI,AB

L42 99328 S MASKS+ALL/CT OR MASK+NT/CT

L43 44095 S (MASK# OR MOUTH PROTECTOR# OR MOUTH GUARD# OR MOUTHGUARD#)/TI,AB

L44 23 S (PROTECT? MOUTH PIECE# OR PROTECT? MOUTHPIECE#)/TI,AB

L45 15985 S GLOVES, PROTECTIVE+NT/CT OR GLOVE+NT/CT

L46 46048 S GLOVE#/TI,AB

L47 1064824 S HAND HYGIENE+ALL/CT OR HAND WASHING+ALL/CT

L48 17823 S (HAND WASHING# OR HANDWASHING#)/TI,AB

L49 21064 S (HAND HYGIENE OR HAND SANITIZATION OR HAND SANITISATION OR HAND DISINFECTION)/TI,AB

L50 13420 S "SOCIAL DETERMINANTS OF HEALTH"/CT

L51 59894 S ((HEALTH OR SOCIAL OR SOCIETAL OR SOCIOECONOMIC OR SOCIO ECONOMIC) (3A) DETERMINANT#)/TI,AB

L52 24503662 S L26-L51

L53 152579 S COVID-19/CT OR CORONAVIRUS DISEASE 2019/CT

L54 255997 S (COVID 19 OR COVID19 OR COVID 2019 OR COVID2019)/TI,AB

L55 55338 S (CORONAVIRUS DISEASE 2019 OR CORONA VIRUS DISEASE 2019)/TI,AB

L56 3100 S (CORONAVIRUS DISEASE 19 OR CORONA VIRUS DISEASE 19)/TI,AB

L57 68099 S SARS-COV-2/CT OR SEVERE ACUTE RESPIRATORY SYNDROME CORONAVIRUS 2+NT/CT

L58 3541 S (2019 NCOV OR 2019 N COV OR NCOV 2019 OR N COV 2019)/TI,AB

L59 4691 S (2019 NOVEL CORONAVIRUS OR 2019 NOVEL CORONA VIRUS OR NOVEL CORONAVIRUS 2019 OR NOVEL CORONA VIRUS 2019)/TI,AB

L60 54 S (2019 NEW CORONAVIRUS OR 2019 NEW CORONA VIRUS)/TI,AB

L61 562 S (CORONAVIRUS 19 OR CORONA VIRUS 19)/TI,AB

L62 3633 S (CORONAVIRUS 2019 OR CORONA VIRUS 2019)/TI,AB

L63 86046 S (SARS COV 2 OR SARS COV2)/TI,AB

L64 29994 S (SEVERE ACUTE RESPIRATORY SYNDROME CORONAVIRUS 2 OR SEVERE ACUTE RESPIRATORY SYNDROME CORONA VIRUS 2)/TI,AB

L65 36 S (SEVERE ACUTE RESPIRATORY SYNDROME CORONAVIRUS2 OR SEVERE ACUTE RESPIRATORY SYNDROME CORONA VIRUS2)/TI,AB

L66 648 S (SARS CORONAVIRUS 2 OR SARS CORONA VIRUS 2)/TI,AB

L67 74 S (WUHAN CORONAVIRUS OR WUHAN CORONA VIRUS OR WUHAN SEAFOOD MARKET PNEUMONIA VIRUS)/TI,AB

L68 299902 S L53-L67

L69 3549 S L16 AND L25 AND L52 AND L68

L70 3532 S L69 AND (ENGLISH OR FRENCH OR SPANISH OR ITALIAN)/LA

L71 2946 S L70 AND 2020/PY

L72 1896 DUP REM L71 (1050 DUPLICATES REMOVED)

## Preprint su PubMed

Databases: medRxiv, bioRxiv, ChemRxiv, arXiv, Research Square e SSRN)

Date: 29th March 2021

Total records: 111 documenti

| Search | Actions | Details | Query                                                                                                                                                                                                                                                                                                                                                                                                                                                                                                                                                                                                                                                                                                                                                                                                                                                                                                                                                                                                                                                                                                                                                                                                                                                                                                                                                                                                                                                                                                                                                                                                                                                                                                                                                                                                                                                                                                                                                                                                                                                                                                                                                                                                                                                                                                                                                                                                                                                                                                                                                                                                                                                                                                                                  | Results | Time     |
|--------|---------|---------|----------------------------------------------------------------------------------------------------------------------------------------------------------------------------------------------------------------------------------------------------------------------------------------------------------------------------------------------------------------------------------------------------------------------------------------------------------------------------------------------------------------------------------------------------------------------------------------------------------------------------------------------------------------------------------------------------------------------------------------------------------------------------------------------------------------------------------------------------------------------------------------------------------------------------------------------------------------------------------------------------------------------------------------------------------------------------------------------------------------------------------------------------------------------------------------------------------------------------------------------------------------------------------------------------------------------------------------------------------------------------------------------------------------------------------------------------------------------------------------------------------------------------------------------------------------------------------------------------------------------------------------------------------------------------------------------------------------------------------------------------------------------------------------------------------------------------------------------------------------------------------------------------------------------------------------------------------------------------------------------------------------------------------------------------------------------------------------------------------------------------------------------------------------------------------------------------------------------------------------------------------------------------------------------------------------------------------------------------------------------------------------------------------------------------------------------------------------------------------------------------------------------------------------------------------------------------------------------------------------------------------------------------------------------------------------------------------------------------------------|---------|----------|
| #1     | ...     | ∨       | <p>Search: <b>PREPRINT[PT] AND (MIGRANTS OR IMMIGRANTS OR REFUGEE OR ETHNIC OR MINORITY OR RACE FACTORS OR "INTERNATIONAL MIGRATION" OR "HUMAN MIGRATION" OR ASYLUM OR ASYLEE OR FORCIBLY DISPLACED OR INTERNALLY DISPLACED OR PROTECTION SEEKER OR IRREGULAR OR ILLEGAL OR UNAUTHORIZED OR UNAUTHORISED)</b></p> <p>"PREPRINT"[Publication Type] AND ("migrant s"[All Fields] OR "transients and migrants"[MeSH Terms] OR ("transients"[All Fields] AND "migrants"[All Fields]) OR "transients and migrants"[All Fields] OR "migrant"[All Fields] OR "migrants"[All Fields] OR ("emigrants and immigrants"[MeSH Terms] OR ("emigrants"[All Fields] AND "immigrants"[All Fields]) OR "emigrants and immigrants"[All Fields] OR "immigrant"[All Fields] OR "immigrants"[All Fields] OR "emigration and immigration"[MeSH Terms] OR ("emigration"[All Fields] AND "immigration"[All Fields]) OR "emigration and immigration"[All Fields] OR "immigration"[All Fields] OR "immigrations"[All Fields] OR "immigrant s"[All Fields] OR "immigrate"[All Fields] OR "immigrated"[All Fields] OR "immigrates"[All Fields] OR "immigrating"[All Fields]) OR ("refugee s"[All Fields] OR "refugees"[MeSH Terms] OR "refugees"[All Fields] OR "refugee"[All Fields]) OR ("ethnic groups"[MeSH Terms] OR ("ethnic"[All Fields] AND "groups"[All Fields]) OR "ethnic groups"[All Fields] OR "ethnic"[All Fields] OR "ethnicity"[All Fields] OR "ethnically"[All Fields] OR "ethnicities"[All Fields] OR "ethnics"[All Fields] OR "ethnology"[MeSH Subheading] OR "ethnology"[All Fields] OR "ethnicity"[All Fields] OR "ethnology"[MeSH Terms]) OR ("minority groups"[MeSH Terms] OR ("minority"[All Fields] AND "groups"[All Fields]) OR "minority groups"[All Fields] OR "minorities"[All Fields] OR "minority"[All Fields] OR "minority s"[All Fields] OR "minors"[MeSH Terms] OR "minors"[All Fields] OR "minor"[All Fields]) OR ("race factors"[MeSH Terms] OR ("race"[All Fields] AND "factors"[All Fields]) OR "race factors"[All Fields]) OR "INTERNATIONAL MIGRATION"[All Fields] OR "HUMAN MIGRATION"[All Fields] OR ("asylum"[All Fields] OR "asylum s"[All Fields] OR "asylums"[All Fields]) OR ("asylee"[All Fields] OR "asylees"[All Fields]) OR ("FORCIBLY"[All Fields] AND ("displace"[All Fields] OR "displaced"[All Fields] OR "displacement, psychological"[MeSH Terms] OR ("displacement"[All Fields] AND "psychological"[All Fields]) OR "psychological displacement"[All Fields] OR "displacement"[All Fields] OR "displacements"[All Fields] OR "displaces"[All Fields] OR "displacing"[All Fields])) OR (("internal"[All Fields] OR "internally"[All Fields] OR "internals"[All Fields]) AND ("displace"[All Fields] OR</p> | 111     | 04:44:38 |

"displaced"[All Fields] OR "displacement, psychological"[MeSH Terms] OR ("displacement"[All Fields] AND "psychological"[All Fields]) OR "psychological displacement"[All Fields] OR "displacement"[All Fields] OR "displacements"[All Fields] OR "displaces"[All Fields] OR "displacing"[All Fields]) OR ("protect"[All Fields] OR "protected"[All Fields] OR "protecting"[All Fields] OR "protection"[All Fields] OR "protections"[All Fields] OR "protective agents"[Pharmacological Action] OR "protective agents"[MeSH Terms] OR ("protective"[All Fields] AND "agents"[All Fields]) OR "protective agents"[All Fields] OR "protectant"[All Fields] OR "protectants"[All Fields] OR "protective"[All Fields] OR "protectively"[All Fields] OR "protectiveness"[All Fields] OR "protectives"[All Fields] OR "protects"[All Fields]) AND ("seeker"[All Fields] OR "seekers"[All Fields])) OR ("irregular"[All Fields] OR "irregularities"[All Fields] OR "irregularity"[All Fields] OR "irregulars"[All Fields]) OR ("illegal"[All Fields] OR "illegality"[All Fields] OR "illegally"[All Fields] OR "illegals"[All Fields]) OR "UNAUTHORIZED"[All Fields] OR "UNAUTHORISED"[All Fields])
