# Supplementary material for: Risk of SARS-CoV-2 infection in migrants and ethnic minorities compared with the general population in the European WHO region during the first year of the pandemic: a systematic review
Source: Springer Nature journal article supplement (doi:10.1186/s12889-021-12466-1), 2022-01-20
Supplement: MOESM2 [file 20052688]

| Citation                                                   | Location, period                          | Study design                        | Exposed population (subgroups)                                                                    | Sample size                   | Characteristics                                                                                                                                                       | Not exposed population                                                                                     | Sample size                   | Characteristics                                                                             | Total sample size | Objective                                                                                                                                                                                                                                                                             | Outcome                                                                                                                   | Effect measures                                              | Results                                                                                                                                                                                                                                                                                                                                                                                                           | Study quality |
|------------------------------------------------------------|-------------------------------------------|-------------------------------------|---------------------------------------------------------------------------------------------------|-------------------------------|-----------------------------------------------------------------------------------------------------------------------------------------------------------------------|------------------------------------------------------------------------------------------------------------|-------------------------------|---------------------------------------------------------------------------------------------|-------------------|---------------------------------------------------------------------------------------------------------------------------------------------------------------------------------------------------------------------------------------------------------------------------------------|---------------------------------------------------------------------------------------------------------------------------|--------------------------------------------------------------|-------------------------------------------------------------------------------------------------------------------------------------------------------------------------------------------------------------------------------------------------------------------------------------------------------------------------------------------------------------------------------------------------------------------|---------------|
| Guijarro C., October 2020 [25]                             | Spain<br>February 1 April 25, 2020        | Population-based cohort study       | Migrants                                                                                          | 20419 (13.4%)                 | Sex<br>Males = 9951<br>Females = 10468<br>Age<br>> 17 years age<br>median age = 40 years                                                                              | Spaniards                                                                                                  | 131599                        | Sex<br>Males = 62588<br>Females = 69011<br>Age<br>> 17 years age<br>median age = 49,5 years | 152018 (86.6)     | To evaluate the incidence of COVID-19 in the first wave of the disease among Spaniards and migrants from different areas of the world living in Alcorcón, a city in the suburbs of Madrid (Spain) with a substantial proportion of foreign residents                                  | Cumulative incidence of RT-PCR <sup>+</sup> confirmed COVID-19                                                            | Cumulative incidence, Relative Risk adjusted for age and sex | <b>Crude cumulative incidence rate</b> migrants = 8.71, Spanish population = 6.51 per 1000 inhabitants (p<0.001).<br><b>Adj. relative risk (RR)</b> people from Sub-Saharan Africa vs Spaniards: RR = 3.66 (95% CI 1.42-9.41, p = 0.007)<br>people from the Caribbean vs Spaniards: RR = 6.35 (95% CI 3.83-10.55, p<0.001)<br>people from Latin America vs Spaniards: RR = 6.92 (95% CI 4.49-10.67 p<0.001)       | High          |
| Jaqueti Aroca J., May 2020 [26]                            | Spain<br>Up to the 2nd week of April 2020 | Cross-sectional                     | Migrants                                                                                          | 259                           |                                                                                                                                                                       | Spaniards                                                                                                  | 1522                          |                                                                                             | 1781              |                                                                                                                                                                                                                                                                                       | Positive SARS-CoV-2 RT-PCR <sup>+</sup>                                                                                   | Positivity Rates                                             | Risk for Covid-19 in people from Sub-Saharan Africa vs Spaniards: RR 3.66 (95% CI 1.42-9.41) (p = 0.007)<br>the Caribbean vs Spaniards: RR = 6.35, 95% CI (3.83-10.55) (p<0.001)<br>Latin America vs Spaniards: RR 6.92, 95% CI (4.49-10.67) (p<0.001)                                                                                                                                                            | Medium        |
| Amengual-Moreno M., September 2020 [27]                    | Spain<br>Until May 14, 2020               | Ecological study                    | Migrants                                                                                          | 24,5% of the total population | NA                                                                                                                                                                    | Total population of the the neighbourhoods of Barcellona                                                   | 75,5% of the total population | NA                                                                                          | 1,600,00          | To determine the relation of social determinants in the incidence of Covid-19 in the city of Barcelona                                                                                                                                                                                | Correlation of the cumulative incidence confirmed by PCR <sup>+</sup> with percentage of immigration of the neighbourhood | r (Pearson linear correlation coefficient)                   | Statistically significant negative correlation between cumulative incidence of COVID-19 and percentage of immigration in the neighbourhood: r = -0.257; p<0.05<br>Statistically significant positive correlation between cumulative incidence of COVID-19 and percentage of Latin American immigrants in the neighbourhood: r=0.322; p<0.01                                                                       | High          |
| Burton-Jeangros C., December 2020 [28]                     | Switzerland<br>April – May 2020           | Cross-sectional mixed-methods study | Migrants (Undocumented and recently regularized migrants)                                         | 108                           | Women: 85 (78.7%)<br>Men: 23 (21.3%)<br>Median age (IQR): 47.7 (16.3)<br>From Latin America: 68 (63.0%)<br>From Asia: 27 (25.0%)<br>From Non-EU/EFTA Europe: 5 (4.6%) | NA                                                                                                         | NA                            | NA                                                                                          | 108               | To describe the impact of the COVID-19 crisis on the health and living circumstances of precarious migrants in Switzerland and to assess whether those undergoing legal status regularization fared better than undocumented migrants                                                 | Referred COVID-19 infection in a questionnaire                                                                            | Prevalence of reported infection                             | Prevalence of COVID-19 infection: 12% of the interviewees reported having had infection                                                                                                                                                                                                                                                                                                                           | Medium        |
| Lundkvist A., August 2020 [29]                             | Sweden<br>June 17-18, 2020                | Cross-sectional study               | Residents in a highly segregated low-income urban area with 98.9% of people of non-Swedish origin | 90                            | Females: 58%<br>Males: 42%<br>Mean age: 37 years                                                                                                                      | Residents in a newly built upper and middle-class area of Stockholm with 98.4% of people of Swedish origin | 123                           | Females: 29%<br>Males: 71%<br>Mean age: 50 years                                            | 213               | To determine the prevalence rates between different areas in Stockholm, with different socio-economic conditions                                                                                                                                                                      | Positive tests for SARS-CoV-2 antibodies                                                                                  | Prevalence                                                   | <b>Positivity</b><br>Residents in the highly segregated low-income area = 30%<br>Residents in the newly built upper and middle-class area: = 4.1%<br>p<0.001                                                                                                                                                                                                                                                      | Medium        |
| The Reggio Emilia COVID-19 Working Group, August 2020 [30] | Italy<br>March 6 – March 26, 2020         | Prevalence study                    | Migrants (immigrant residents)                                                                    | 225                           | Males: 101<br>Females: 114<br>47 years: 106 ≤ 48-<br>60 years: 66 > 60<br>years: 43                                                                                   | Italian residents in Reggio Emilia province (Italy)                                                        | 2420                          | Males: 1294<br>Females: 1126<br>≤ 47 years: 590<br>48-60 years: 587<br>> 60 years: 1243     | 2635              | To present the age- and sex adjusted probability of being tested and of receiving a diagnosis of COVID-19 infection and the positive predictive value of the referral to swab in immigrants and Italians in Reggio Emilia province and to test the protective role of BCG vaccination | Positive SARS-CoV-2 PCR <sup>+</sup>                                                                                      | Prevalence, Odds Ratio adjusted for age and sex              | <b>Probability of being positive</b> among those tested between immigrants and Italians: OR = 1.1 (95% CI 0.83-1.5)<br><b>Proportion of tested people</b> among foreigners and Italians: OR = 0.93 (95% CI 0.81-1.1)<br>The <b>adjusted ORs</b> of the probability of testing positive immigrant women vs immigrant men: OR = 2.7 (95% CI 1.4-4.9)<br>Italian women vs Italian men: OR = 0.74 (95% CI 0.62-0.88). | High          |

|                                      |                                |                          |                                                                                                                                         |                                                                           |                                                                                                                                                         |                                   |                                                              |                                                                                                                                                       |                                                                                                                                                              |                                                                                                                                                                                                                                                                                                                                  |                                                                                            |                                                                                                                                          |                                                                                                                                                                                                                                                                                                                                                                                                                                                                                                                                                                                                                                                                             |        |
|--------------------------------------|--------------------------------|--------------------------|-----------------------------------------------------------------------------------------------------------------------------------------|---------------------------------------------------------------------------|---------------------------------------------------------------------------------------------------------------------------------------------------------|-----------------------------------|--------------------------------------------------------------|-------------------------------------------------------------------------------------------------------------------------------------------------------|--------------------------------------------------------------------------------------------------------------------------------------------------------------|----------------------------------------------------------------------------------------------------------------------------------------------------------------------------------------------------------------------------------------------------------------------------------------------------------------------------------|--------------------------------------------------------------------------------------------|------------------------------------------------------------------------------------------------------------------------------------------|-----------------------------------------------------------------------------------------------------------------------------------------------------------------------------------------------------------------------------------------------------------------------------------------------------------------------------------------------------------------------------------------------------------------------------------------------------------------------------------------------------------------------------------------------------------------------------------------------------------------------------------------------------------------------------|--------|
| Woolford S.J., July 2020 [32]        | UK<br>March 16 – June 1, 2020  | Prevalence study         | BAME <sup>a</sup>                                                                                                                       | 34011                                                                     |                                                                                                                                                         | White ethnicity                   | 468629                                                       |                                                                                                                                                       | 502640<br><b>Sex</b><br>Male = 226,921 (45.6%)<br>Female = 275,719 (54.4%)<br><b>Age at baseline (years)</b> = 58.0 (50.0, 63.0)                             | To investigate whether frailty and multimorbidity were associated with risk of hospitalisation with COVID-19.                                                                                                                                                                                                                    | Positive SARS-CoV-2 PCR <sup>b</sup>                                                       | Prevalence                                                                                                                               | Non-White individuals = 13.8% of the COVID-19 positive cohort and 7.9% of the negative one (p<0.001)                                                                                                                                                                                                                                                                                                                                                                                                                                                                                                                                                                        | Medium |
| Raisi-Estabragh Z., August 2020 [33] | UK<br>March 16 – May 18, 2020  | Prospective cohort study | BAME <sup>a</sup>                                                                                                                       | BAME ethnicity = 415<br>Mixed ethnicity = 33                              |                                                                                                                                                         | White ethnicity                   | 4068                                                         |                                                                                                                                                       | 4510<br><b>Sex</b><br>Men = 2201<br>Women = 2309<br><b>Age</b> = 68.11 (± 9.23) for test positive<br><b>Age</b> = 68.91 (± 8.72) for negative test           | To examine whether the greater severity of coronavirus disease 2019 (COVID-19) amongst men and Black, Asian and Minority Ethnic (BAME) individuals is explained by cardiometabolic, socio-economic or behavioural factors.                                                                                                       | COVID-19 positive test                                                                     | Incidence Rates OR adjusted for sex, age, ethnicity, smoking, BMI, diabetes, hypertension, high cholesterol, prior MI                    | <b>Positive COVID-19 test</b><br>BAME ethnicity = 13.1% (Black ethnicity = 5.7%, Asian ethnicity = 4.5%)<br><b>Risk for COVID-19 positive status</b> (BAME ethnicity vs White ethnicity): adj OR = 1.78, 95% CI (1.43-2.20)                                                                                                                                                                                                                                                                                                                                                                                                                                                 | High   |
| Kolin D.A., November 2020 [36]       | UK<br>From March 16, 2020      | Prospective cohort study | BAME <sup>a</sup> (Black and Asian races)                                                                                               | Black race = 10181<br>Asian race = 7431                                   |                                                                                                                                                         | White race                        | 374090                                                       |                                                                                                                                                       | 397064<br><b>Age</b> (mean, SD) = 56.4 (8.1)<br><b>Sex</b><br>Males = 179353 (45.2%)<br>Females = 217711 (54.8%)                                             | To analyze the effects of clinical, regional, and genetic factors on Covid-19 positive status                                                                                                                                                                                                                                    | Positive SARS-CoV-2 PCR <sup>b</sup>                                                       | Relative Risk, Odds ratio, adjusted Relative Risk for age, sex, body-mass index, systolic blood pressure, and Townsend deprivation index | <b>Risk of Covid-19</b> ( vs White race): RR = 3.66 (95% CI 2.83–4.74)<br>Adj RR = 2.44 (95% CI [1.86–3.20])                                                                                                                                                                                                                                                                                                                                                                                                                                                                                                                                                                | High   |
| Niedzwiedz C.L., May 2020 [37]       | UK<br>March 16 – May 3, 2020   | Prospective cohort study | Ethnic minorities                                                                                                                       | Mixed = 18<br>South Asian = 74<br>Black = 94<br>Chinese = 4<br>Other = 37 |                                                                                                                                                         | White ethnicity                   | White British = 2265<br>White Irish = 82<br>White Other = 84 |                                                                                                                                                       | 2658<br><b>Age</b> = 40-70+                                                                                                                                  | To investigate the relationship between ethnicity, socioeconomic position and the risk of having confirmed SARS-CoV-2 infection in the population-based UK Biobank study.                                                                                                                                                        | Positive SARS-CoV-2 microbiological tests                                                  | Relative risk adjusted for social variables                                                                                              | <b>Risk of testing positive for SARS-CoV-2 infection</b> (ethnic minorities vs White ethnicity) Black ethnicity: RR = 3.35 (95% CI 2.48–4.53)<br>South Asian ethnicity: RR = 2.42, (95% CI 1.75-3.36)<br><b>Adjusted RR</b><br>RR adj. for the country of birth = 3.13 (95% CI 2.18–4.48) RR adj. for a history of being a healthcare worker = 2.66 (95% CI 1.83–3.84)<br>RR adj. for other social factors including employment status, housing tenure and household size = 2.05 (95% CI 1.39–3.03) <b>Risk of testing positive for SARS-CoV-2 infection</b> for Asian ethnicity: Pakistani group = RR 3.24 (95% CI 1.73–6.07)<br>Indian group = RR 1.98 (95% CI 1.26–3.09) | High   |
| Chateau-Hyam M., October 2020 [38]   | UK<br>March 16 – May 18, 2020  | Prospective cohort study | Ethnic minorities                                                                                                                       | Black ethnicity = 7946<br>Other ethnicity = 18633                         |                                                                                                                                                         | White ethnicity                   | 458833                                                       |                                                                                                                                                       | 488083<br>Mean age (SD) of non-tested participants = 68.06 (8.10)<br>Mean age (SD) of tested participants = 68.64 (8.88)<br>Female = 267716<br>Male = 220367 | To identify risk factors for testing positive or negative for SARS-CoV-2 infection up to 18 May 2020, as well as those discriminating test positive vs test negative individuals using a test negative design approach                                                                                                           | Positive SARS-CoV-2 RT-PCR <sup>b</sup>                                                    | Odds Ratio adjusted for demographic descriptors, social, health risk, medical, and environmental factors                                 | <b>Risk of testing positive for SARS-CoV-2</b><br>Black ethnicity vs White ethnicity: OR = 2.14 (95% CI 1.57-2.93)<br>Other ethnicities vs White ethnicity: OR = 1.68 (95% CI 1.29-2.18)<br><b>OR adjusted</b> for demographic descriptors, social, health risk, medical, and environmental factors Blacks vs Whites: OR = 1.11 (95% CI 1.03-1.19)<br>Other ethnicities vs Whites: OR = 1.14 (95% CI 1.06-1.23)                                                                                                                                                                                                                                                             | High   |
| Razieh C., October 2020 [39]         | UK<br>March 16 – June 14, 2020 | Prevalence study         | BAME <sup>a</sup> (minority ethnic - BME - groups - particularly South Asian - SA - and black African or Caribbean - BAC - populations) | 271                                                                       | Median (IQR) <b>age</b> = 64.8 (57.9, 73.2) years old<br><b>BMI</b> = 28.2 (25.2, 33.1) kg/m2<br><b>Sex</b><br>Women = 136 (50.2%)<br>Men = 135 (49.8%) | White ethnicity (white Europeans) | 5352                                                         | Median (IQR) <b>age</b> = 71.3 (62.3, 76.1) years<br><b>BMI</b> = 27.6 (24.8, 30.9) kg/m2<br><b>Sex</b><br>Women = 2650 (49.5%)<br>Men = 2702 (50.5%) | 5623                                                                                                                                                         | 1) Quantify the association of BMI with the risk of a positive test for COVID-19, stratified by ethnic group 2) Investigate whether the odds of COVID-19 in minority ethnic (BME) groups - particularly South Asian (SA) and black African or Caribbean (BAC) individuals relative to white Europeans (WES) varied by BMI level. | Interaction between ethnicity and obesity on the risk of COVID-19 positive laboratory test | Prevalence, Odds Ratio stratified by Body Mass Index                                                                                     | <b>Positivity rate</b><br>BAME = 32.1%<br>White Ethnicity = 18.7%<br><b>Risk for higher Body Mass Index (BMI) values</b> (BAME vs White population)<br>BMI = 25: OR = 0.96 (95% CI 0.61-1.52)<br>BMI = 35: OR = 2.56 (95% CI 1.63-4.03)                                                                                                                                                                                                                                                                                                                                                                                                                                     | Medium |

|                               |                                  |                          |                                                                      |                                                                                                                                                                                                                                                                                                                                                                                                     |                       |                                                                       |        |                       |                                                                                                                                                                                                                                |                                                                                                                                                                                                                                                                             |                                                                                             |                                                                                                                                                                                                                                                                              |                                                                                                                                                                                                                                                                                                                                       |      |
|-------------------------------|----------------------------------|--------------------------|----------------------------------------------------------------------|-----------------------------------------------------------------------------------------------------------------------------------------------------------------------------------------------------------------------------------------------------------------------------------------------------------------------------------------------------------------------------------------------------|-----------------------|-----------------------------------------------------------------------|--------|-----------------------|--------------------------------------------------------------------------------------------------------------------------------------------------------------------------------------------------------------------------------|-----------------------------------------------------------------------------------------------------------------------------------------------------------------------------------------------------------------------------------------------------------------------------|---------------------------------------------------------------------------------------------|------------------------------------------------------------------------------------------------------------------------------------------------------------------------------------------------------------------------------------------------------------------------------|---------------------------------------------------------------------------------------------------------------------------------------------------------------------------------------------------------------------------------------------------------------------------------------------------------------------------------------|------|
| Kakkar N., May 2020 [40]      | UK<br>March 1 – April 25, 2020   | Cross-sectional study    | BAME <sup>a</sup>                                                    | 296                                                                                                                                                                                                                                                                                                                                                                                                 | Median age = 55 years | White ethnicity                                                       | 2424   | Median age = 77 years | 3018 (298 of not known ethnicity)<br><b>Sex</b><br>Female = 1493<br>Male = 1499<br>Gender-unknown = 26                                                                                                                         | To investigate the potential associations between ethnicity and COVID-19                                                                                                                                                                                                    | Positive COVID-19 tests                                                                     | Prevalence                                                                                                                                                                                                                                                                   | <b>Positive test in BAME patients vs White cohort:</b> p=0.026<br>BAME men vs BAME women: p=0.007, and vs White men: p=0.009                                                                                                                                                                                                          | Low  |
| de Lusignan S., May 2020 [41] | UK<br>January 28 – April 4, 2020 | Cross-sectional study    | Ethnic minorities                                                    | Asian = 152<br>Black = 58<br>Mixed, other = 81                                                                                                                                                                                                                                                                                                                                                      |                       | White ethnicity                                                       | 2497   |                       | 3802 of which 1014 of missing ethnicity<br><b>Age</b><br>0–17 499 (13.1%)<br>18–39 = 666 (17.5%)<br>40–64 = 1316 (34.6%)<br>65–74 = 557 (14.7%) ≥75 =764 (20.1%)<br><b>Sex</b><br>Female = 2190 (57.6%)<br>Male = 1612 (42.4%) | To identify demographic and clinical risk factors for testing positive for SARS-CoV-2                                                                                                                                                                                       | Positive SARS-CoV-2 RT-PCR <sup>b</sup>                                                     | Odds Ratio adjusted for age sex, socioeconomic deprivation level, household size, settlement or population density, smoking status, BMI, hypertension, chronic kidney disease, diabetes, chronic heart disease, chronic respiratory disease, malignancy or immunocompromised | <b>Risk of testing positive for SARS-CoV-2</b> (Blacks vs Whites): adj. OR = 4.75 (95% CI 2.65–8.51)<br><b>Risk of testing positive for SARS-CoV-2</b> (Asians vs Whites): adj. OR = 1.46 (95% CI 0.94–2.29)<br><b>Prevalence rate</b><br>White people = 15.5% (388/2,497)<br>Black people = 62.1% (36/58)                            | High |
| Hull A.S., October 2020 [42]  | UK<br>January 1 – April 30, 2020 | Cross-sectional study    | Ethnic minorities                                                    | South Asian = 262323<br>Black = 154882<br>Other 79048                                                                                                                                                                                                                                                                                                                                               |                       | White ethnicity                                                       | 479192 |                       | 1257137 (281692 of not stated/missing ethnicity)<br><b>Age, years</b><br>18–49 = 932020<br>50–69 = 238339<br>≥70 1128 = 86778<br><b>Sex</b><br>Male = 636064<br>Female = 621073                                                | To quantify the prevalence and time course of clinically suspected COVID-19 presenting to general practices, to report the risk of suspected COVID-19 by ethnic group, and to identify whether differences by ethnicity can be explained by clinical data in the GP record. | The diagnosis of suspected COVID-19 based on contact history and symptoms given by patients | Prevalence, Odds Ratio adjusted for age, sex, ethnicity, internal IMD 2015 quintiles, QOF long term conditions, BMI (kg/m <sup>2</sup> )                                                                                                                                     | <b>Odds of suspected COVID-19</b> (based on contact history and symptoms)<br>South Asian vs White: OR = 1.98 (95% CI 1.86-2.09)<br>Black vs White: OR = 1.88 (95% CI [1.77 - 2.0])<br><b>Adjusted analysis</b> South Asian patients vs White population: OR = 1.93 (95% CI 1.83-2.04)<br>Black patients: OR = 1.47 (95% CI 1.38-1.57) | High |
| Nguyen L.H., July 2020 [43]   | UK, USA<br>March – April, 2020   | Prospective cohort study | Ethnic minorities (general population; frontline healthcare workers) | <b>General community</b><br>Hispanic or Latinx = 0.5%<br>Black = 0.6%<br>Asian = 2.2%<br>More than one or other = 2.9<br>Missing data for race or ethnic origin, prefer not to say = 1.3<br><b>Front-line healthcare workers</b><br>Hispanic or Latinx = 1.1%<br>Black = 1.2%<br>Asian = 4.4%<br>More than one or other = 2.4<br>Missing data for race or ethnic origin, or prefer not to say = 2.7 |                       | Non-Hispanic white (general population; frontline healthcare workers) |        |                       | <b>General community</b> = 2035395<br>Age = 44 (33–56)<br>Sex Male = 37.0%<br>Female = 63.0%<br><b>Front-line healthcare workers</b> = 99795<br>Age = 42 (33–53)<br>Sex Male = 17.0%<br>Female = 83.0%                         | To investigate the risk of testing positive for COVID-19, the risk of developing symptoms associated with SARS-CoV-2 infection, or both, among individuals in the UK and the USA, using data from a smartphone-based application                                            | Report of a positive COVID-19 test through an app                                           | Hazard Ratio adjusted for sex, history of diabetes, heart disease, lung disease, kidney disease, current smoking, and body-mass index                                                                                                                                        | Risk for positive COVID-19 test (Hazard ratio (HR)) (individuals from Black, Asian, and minority ethnic backgrounds vs White individuals): adj. HR = 2.51 (95% CI 2.18–2.89)                                                                                                                                                          | High |

|                                           |                                      |                            |                                                                                                    |                                                                                                                                                                                                                                                                                                                                                                 |  |                                    |                                                                                  |                                                                                                    |                                                                                                                                                                                                                                                                                |                                                                                                                                                                                                                                                             |                                                                                                                                          |                                                                                            |                                                                                                                                                                                                                                                                                                                                                                                                                                                                                                                                                  |        |
|-------------------------------------------|--------------------------------------|----------------------------|----------------------------------------------------------------------------------------------------|-----------------------------------------------------------------------------------------------------------------------------------------------------------------------------------------------------------------------------------------------------------------------------------------------------------------------------------------------------------------|--|------------------------------------|----------------------------------------------------------------------------------|----------------------------------------------------------------------------------------------------|--------------------------------------------------------------------------------------------------------------------------------------------------------------------------------------------------------------------------------------------------------------------------------|-------------------------------------------------------------------------------------------------------------------------------------------------------------------------------------------------------------------------------------------------------------|------------------------------------------------------------------------------------------------------------------------------------------|--------------------------------------------------------------------------------------------|--------------------------------------------------------------------------------------------------------------------------------------------------------------------------------------------------------------------------------------------------------------------------------------------------------------------------------------------------------------------------------------------------------------------------------------------------------------------------------------------------------------------------------------------------|--------|
| Martin C.A., July 2020 [44]               | UK<br>March 1 – April 28, 2020       | Retrospective cohort study | Ethnic minorities                                                                                  | South Asian = 710<br>Black = 122<br>Other = 152                                                                                                                                                                                                                                                                                                                 |  | White Caucasian                    | 3067                                                                             |                                                                                                    | 4051<br><b>Age</b> (years), median (IQR) = 64 (45–78)<br><b>Gender</b><br>Female = 1979 (48.9%)<br>Male = 2072 (51.2%)                                                                                                                                                         | To investigate the factors associated with prevalent COVID-19 among hospital attenders, and secondly to establish whether temporal changes in the proportion of positive test results before and after institution of lockdown measures differ by ethnicity | Positive SARS-CoV-2 PCR <sup>b</sup> before/after lockdown                                                                               | Positivity Rates, Odds Ratio adjusted for age, gender, ethnicity, estimated household size | <b>Positivity rate</b><br>White = 20.0%<br>South Asian = 37.5%<br>Black = 36.1%<br>Other = 32.2%<br>p<0.001 for all ethnic minority groups vs White<br><b>Positivity risk</b><br>South Asian: adj. OR = 2.44 (95% CI 2.01-2.97)<br>Black: adj. OR = 2.56 (95% CI 1.71-3.84)<br>Other: adj. OR = 2.53 (95% CI 1.74-3.70)<br><b>PCR positivity before the lockdown</b> (other ethnicities vs White): adj. OR = 2.70 (95% CI 1.86-3.91)<br><b>PCR positivity after the lockdown</b> (other ethnicities vs White): adj. OR = 2.45 (95% CI 1.98-3.02) | High   |
| Platt L., June 2020 [46]                  | UK<br>Up to May 2020                 | Ecological study           | Ethnic minorities (White other, Indian, Pakistani, Bangladeshi, black African and black Caribbean) | NA                                                                                                                                                                                                                                                                                                                                                              |  | White British majority             | NA                                                                               | NA                                                                                                 | To investigate the extent to which different ethnic groups have been more or less affected by the immediate impact of the COVID-19 crisis, both in terms of exposure to infection and health risks, including mortality, and in relation to their exposure to economic impacts | Predicted number of lab-confirmed COVID-19 cases per 100,000 of group population                                                                                                                                                                            |                                                                                                                                          |                                                                                            | Black Caribbean individuals on average reside in areas with 17% more confirmed cases per capita than White British individuals. Proportion of households in London having more residents than rooms<br>White British = 2%<br>Bangladeshis = 30%<br>Pakistanis = 18% and Black Africans = 16%<br>Employment<br>1/3 of the Black African ethnic group are employed in key worker role<br>1/5 in health and social care jobs<br>37% of the UK's doctors are foreign-born (nearly 10% are from India, while 7% of nurses are Black Africans)         | Medium |
| Birenbaum-Carmeli D., September 2020 [47] | Israel<br>February 23 – June 2, 2020 | Cross-sectional study      | Ethnic minorities (Arab communities)                                                               |                                                                                                                                                                                                                                                                                                                                                                 |  | Jewish communities                 |                                                                                  |                                                                                                    | To explore the extent to which factors such as socio-economic status (SES), population density, size of elderly population and minority status are associated with morbidity rates in Israel's residential communities                                                         | Number of confirmed COVID-19 cases in each community                                                                                                                                                                                                        | Morbidity rates                                                                                                                          |                                                                                            | Jewish communities suffered 1.68 higher morbidity rates compared to Arab communities (b = 1.68, β = 0.437).<br>The descriptive statistics suggest:<br>1. Inverse association between a community's SES and its morbidity rate<br>2. Positive association between population density and morbidity<br>3. Inverse relation between percentage of elderly population and morbidity.                                                                                                                                                                 | High   |
| Shields A., September 2020 [48]           | UK<br>April 24-25, 2020              | Cross-sectional study      | BAME <sup>a</sup> (Healthcare workers)                                                             | Asian British<br>Bangladeshi = 2 (0.4%)<br>Asian British<br>Indian = 25 (4.8%)<br>Asian British<br>Pakistani = 11 (2.1%)<br>Asian British<br>other/not stated = 18 (3.5%)<br>Asian British<br>Pakistani = 11 (2.1%)<br>Black African = 10 (1.9%)<br>Black British = 17 (3.3%)<br>Filipino 21 (4.1%)<br>Mixed heritage = 10 (1.9%)<br>Not disclosed = 74 (14.3%) |  | White British (Healthcare workers) | White Irish = 5 (1.0%)<br>White other = 25 (4.8%)<br>White British = 285 (55.2%) | 516<br><b>Age</b> (years) = 42 (30–51)<br><b>Sex</b><br>Male = 128 (24.8%)<br>Female = 388 (75.2%) | To determine the rates of asymptomatic viral carriage and seroprevalence of SARS-CoV-2 antibodies in healthcare workers                                                                                                                                                        | Positive tests for SARS-CoV-2 antibodies                                                                                                                                                                                                                    | Prevalence, Odds Ratio adjusted for age, sex, ethnicity, Index of Multiple Deprivation score and department in which participants worked |                                                                                            | <b>Risk of seropositivity</b> (employees of BAME ethnicity vs employees of White ethnicity): adj. OR = 1.92 (95% CI 1.14-3.23)                                                                                                                                                                                                                                                                                                                                                                                                                   | High   |

|                                 |                                    |                                           |                                            |                                                                                                                                                        |                                                                                                                                                                                                                                                                                            |                                          |              |                                                                                                                    |                                                                                                                                                             |                                                                                                                                                                                                                                 |                                                             |                                                                                                                                                                                                                                                                       |                                                                                                                                                                                                                                                                                                                                                                                                                           |        |
|---------------------------------|------------------------------------|-------------------------------------------|--------------------------------------------|--------------------------------------------------------------------------------------------------------------------------------------------------------|--------------------------------------------------------------------------------------------------------------------------------------------------------------------------------------------------------------------------------------------------------------------------------------------|------------------------------------------|--------------|--------------------------------------------------------------------------------------------------------------------|-------------------------------------------------------------------------------------------------------------------------------------------------------------|---------------------------------------------------------------------------------------------------------------------------------------------------------------------------------------------------------------------------------|-------------------------------------------------------------|-----------------------------------------------------------------------------------------------------------------------------------------------------------------------------------------------------------------------------------------------------------------------|---------------------------------------------------------------------------------------------------------------------------------------------------------------------------------------------------------------------------------------------------------------------------------------------------------------------------------------------------------------------------------------------------------------------------|--------|
| Martin C.A., November 2020 [49] | UK<br>May 2020                     | Cross-sectional study                     | Ethnic minorities (Hospital staff members) | South Asian = 2494 (23.4%)<br>Black = 553 (5.2%)<br>Other = 655 (6.1%)                                                                                 | <b>Age</b> (years), median (IQR)<br>South Asian = 41 (31–50)<br>Black = 42 (32–49)<br>Other = 42 (33–49)<br><b>Sex</b> , n(%)<br>South Asian: Female = 1817 (72.9%) Male = 677 (27.2%)<br>Black: Female = 447 (80.8%) Male = 106 (19.2%)<br>Other: Female = 443 (67.7%) Male = 212 (32.4%) | White ethnicity (Hospital staff members) | 6960 (65.3%) | <b>Age</b> (years), median (IQR) = 46 (34–55)<br><b>Sex</b> , n(%)<br>Female = 5796 (83.3%)<br>Male = 1164 (16.7%) | 10662                                                                                                                                                       | To examine the seroprevalence of anti-SARS-CoV-2 IgG amongst hospital staff employed at University Hospitals of Leicester (UHL) NHS Trust                                                                                       | Positive tests for SARS-CoV-2 antibodies                    | Prevalence, Odds Ratio adjusted for age, sex, ethnicity, occupation, speciality, path/Micro), IMD quintile, population density of output area, reason for absence from work                                                                                           | <b>Seroprevalence</b><br>White = 9.1%<br>Black = 21.2%<br>South Asian = 12.3% <b>Seropositivity</b> (staff of minority ethnicity vs staff of White ethnicity)<br>Black: adj. OR = 2.42 (95% CI 1.90–3.09)<br>South Asian: adj. OR = 1.26 (95% CI 1.07–1.49)<br><b>Seropositivity rates</b><br>Black nurses = 23.9% vs 11.0% of White nurses (p < 0.001)<br>South Asian nurse = 17.7% vs 11.0% of White nurses (p < 0.001) | High   |
| Razvi S., November 2020 [50]    | UK<br>May 28 – June 8, 2020        | Cross-sectional study                     | BAME <sup>a</sup> (Healthcare workers)     | 72 (3.4%)                                                                                                                                              |                                                                                                                                                                                                                                                                                            | White ethnicity (Healthcare workers)     | 2028 (96.6%) |                                                                                                                    | 2100 members of staff<br>2521 samples<br>Mean <b>age</b> (SD) = 42.5 (12.6)<br><b>Sex</b><br>Female = 2317 (91.9%)<br>Male = 204 (8.1%)                     | To ascertain the prevalence of antibody positivity in HCWs and, in addition, determine if specific groups such as men, frontline staff and BAME HCWs may have had more exposure than others                                     | Positive tests for SARS-CoV-2 antibodies                    | Prevalence, Odds ratio adjusted for age, gender and role within the organization                                                                                                                                                                                      | <b>Seroprevalence</b> for SARS-CoV-2 antibody<br>BAME = 19.4% White = 19.5% (p=1.00)<br>Risk of positive test (BAME vs White): adj. OR = 1.03 (95% CI 0.56–1.87)                                                                                                                                                                                                                                                          | High   |
| Leeds J.S., August 2020 [51]    | UK<br>April 1-28, 2020             | Cohort study                              | BAME <sup>a</sup> (Healthcare workers)     | Indian subcontinent = 22<br>Chinese Asian = 4<br>Other Asian = 9<br>Mid East = 2<br>African = 5<br>Other ethnic group = 7<br>Not stated/declined = 370 |                                                                                                                                                                                                                                                                                            | White ethnicity (Healthcare workers)     | 572          |                                                                                                                    | 991<br><b>Age</b><br>≤ 24 = 62<br>25 - 34 = 238<br>35 - 44 = 218<br>45 - 54 = 296<br>55 - 64 = 162<br>≥ 65 = 15<br><b>Sex</b><br>Male = 145<br>Female = 846 | To report the results of the staff testing programme in a large acute NHS Trust in the UK and examine the characteristics of affected healthcare workers including ethnicity                                                    | Positive SARS-CoV-2 RT-PCR <sup>b</sup>                     | Incidence Rates, Odds Ratio adjusted for age, male sex, acute frontline worker, BAME status                                                                                                                                                                           | <b>Incidence of SARS-CoV-2</b><br>BAME = 45.1%<br>non-BAME = 45.3%<br><b>Risk of positive test</b><br>Adj. OR = 1.08 (95% CI 0.56 – 2.04)                                                                                                                                                                                                                                                                                 | High   |
| Knight M., June 2020 [52]       | UK<br>March 1 – April 14, 2020     | Prospective population-based cohort study | Ethnic minorities (pregnant women)         | Asian = 103 (25%)<br>Black = 90 (22%)<br>Chinese/other = 30 (7%)<br>Mixed = 10 (2%)<br>Missing data = 10                                               |                                                                                                                                                                                                                                                                                            | White ethnicity (pregnant women)         | 184          |                                                                                                                    | 427<br><b>Age</b><br>< 20 = 4 (1%)<br>20-34 = 248 (58%)<br>≥ 35 = 175 (41%)                                                                                 | To describe a national cohort of pregnant women admitted to hospital with SARS-CoV-2 infection, identify factors associated with infection, and describe outcomes, including transmission of infection, for mothers and infants | Cumulative incidence of PCR <sup>b</sup> confirmed COVID-19 | Incidence Rates, Rate Ratio                                                                                                                                                                                                                                           | <b>Incidence of SARS-CoV-2</b> (per 1000 maternities)<br>White = 3.5<br>Blacks = 28.4<br>Asians = 13.9<br>Chinese/other = 28.4<br>Mixed ethnicities = 9.5<br><b>Rate ratio</b> (BAME women vs white women)<br>Blacks: rate ratio = 8.1 (95% CI 6.2-10.5)<br>Asians: rate ratio = 4.0 (95% CI 3.1-5.1)<br>Chinese/other: rate ratio = 2.7 (95% CI 1.7-4.0) Mixed ethnicities: rate ratio = 2.0, (95% CI 0.9-3.8).          | Medium |
| Elias M., October 2020 [53]     | France<br>March 1 – April 30, 2020 | Prospective cohort study                  | Ethnic minorities (Kidney recipients)      | 222                                                                                                                                                    |                                                                                                                                                                                                                                                                                            | White ethnicity (Kidney recipients)      | 994          |                                                                                                                    | 1216<br><b>Age</b> = 54.1 ± 13.4<br><b>Sex</b><br>Male = 777<br>Female = 439                                                                                | To evaluate the prevalence of COVID-19 disease in a nonselected population of kidney recipients, to detect modifiable and nonmodifiable determinants associated with the susceptibility and severity of COVID-19 infection      | Positive SARS-CoV-2 PCR <sup>b</sup>                        | Odds Ratio adjusted for age, sex, ethnicity, donor type, time on dialysis before graft, time from transplant to evaluation, serum creatinine, obesity, diabetes, hypertension, asthma and chronic pulmonary disease, cardiovascular disease, and prednisone treatment | Non-White COVID-19-positive patients = 36.4% (24/66)<br>Non-White COVID-19 negative patients = 17.2% (198/1150) p=0.001<br><b>Association of ethnicity with COVID-19 disease</b> (non-White versus white)<br>Adj. OR = 2.17 (95% CI 1.23-3.78) (p=0.007)                                                                                                                                                                  | High   |
